# Supplementary material for: Resampling to address inequities in predictive modeling of suicide deaths
Source: HighWire-hosted journal article supplement (doi:10.1136/bmjhci-2021-100456), 2022-04-01
Supplement: bmjhci-2021-100456supp001_data_supplement.pdf [file bmjhci-2021-100456supp001_data_supplement.pdf]

**Supplementary Online Content****Administrative Patient Records (APRs)**

The APRs contain information for each patient at each visit. In this data set, each APR is complete, meaning this is a complete-case analysis. Each record includes 612 predictors. The general categories from which all predictors stem are provided in Table S1.

*Table S1. All predictors used for building predictive models. Categorical variables were one hot encoded, generating a space of 612 predictors. ED denotes emergency department while PD denotes inpatient hospitalization.*

| <b>Description</b>     | <b>Type</b>               | <b>Description</b>  | <b>Type</b>              |
|------------------------|---------------------------|---------------------|--------------------------|
| Age                    | Numeric                   | Insurance Category  | Categorical (5 levels)   |
| ED Visit               | Binary                    | Disposition (ED)    | Categorical (34 levels)  |
| PD Visit               | Binary                    | Disposition (PD)    | Categorical (14 levels)  |
| Facility ID Number     | Numeric                   | Payer (ED)          | Categorical (22 levels)  |
| Facility Zip           | Numeric                   | Facility County     | Categorical (58 levels)  |
| Corrected Zip          | Numeric                   | Type of Care        | Categorical (6 levels)   |
| Hospital Zip           | Numeric                   | Source Site         | Categorical (10 levels)  |
| Rural / Urban Score    | Numeric                   | Admission Type      | Categorical (5 Levels)   |
| Length of Stay         | Numeric                   | Payer Category      | Categorical (10 Levels)  |
| Pay Plan               | Numeric                   | Payer Type          | Categorical (4 Levels)   |
| Domain Expert Features | One numeric and 19 binary | Patient County      | Categorical (58 Levels)  |
| Present on Arrival     | Binary                    | Hospital County     | Categorical (58 Levels)  |
| Sex                    | Categorical (4 Levels)    | CCS Diagnostic Code | Categorical (262 Levels) |
| Race                   | Categorical (7 levels)    | E-Codes             | Categorical (24 Levels)  |

Table S2 contains selected feature prevalence for each of the resampling methods. We have selected a subset of features to display for purposes of illustration. We show in Table S2 the average patient age in each data set, the percentage of files associated with male patients, and the self-harm, suicidal ideation, and CCS codes for mental health and substance abuse per 100,000 files. Note that each data set varies in size due to the resampling rate. As we only resample the training set, All Data represents the distribution for approximately 60% of the raw data, with the remaining data split between the validation and test sets. As such, the validation and test sets will have distributions similar to All Data or data collected in the real world. We utilize the training and validation sets for model development and then use the test set for model validation. Recall that the set of patients in the test set is totally disjoint from the sets of patients in either the validation or training sets. Hence this model is best described as Type 2a under the TRIPOD statement list of prediction types[1].

Table S2. Feature prevalence for each resampling method. All data focuses on the entirety of the training set. We look at average age, sex, self-harm, suicidal ideation, and the CCS codes for mental health and substance abuse (MHSA). This table only describes distributions for one random shuffling, splitting, and sampling of the data.

|                                                                                                | <i>All Data</i> |                    | <i>Blind Resampling</i> |                    | <i>Equity Resampling</i> |                    | <i>Separate Resampling</i> |      |              |      |                 |      |              |      |
|------------------------------------------------------------------------------------------------|-----------------|--------------------|-------------------------|--------------------|--------------------------|--------------------|----------------------------|------|--------------|------|-----------------|------|--------------|------|
|                                                                                                | <b>Suicide</b>  | <b>Non-Suicide</b> | <b>Suicide</b>          | <b>Non-Suicide</b> | <b>Suicide</b>           | <b>Non-Suicide</b> | <b>Asian</b>               |      | <b>Black</b> |      | <b>Hispanic</b> |      | <b>White</b> |      |
| <i>Average Age</i>                                                                             | 47              | 46                 | 47                      | 46                 | 44                       | 46                 | 51                         | 53   | 39           | 42   | 39              | 40   | 49           | 51   |
| <i>Men (%)</i>                                                                                 | 66              | 44                 | 66                      | 43                 | 68                       | 43                 | 69                         | 44   | 73           | 41   | 66              | 45   | 64           | 45   |
| <i>Self-Harm per 100,000</i>                                                                   | 6800            | 380                | 6800                    | 349                | 8377                     | 370                | 10349                      | 134  | 7291         | 307  | 7593            | 259  | 6323         | 401  |
| <i>Suicidal Ideation per 100,000</i>                                                           | 3505            | 513                | 3505                    | 484                | 3663                     | 440                | 2957                       | 269  | 5909         | 460  | 3333            | 481  | 3419         | 599  |
| <i>650 MHSA: Adjustment disorders per 100,000</i>                                              | 488             | 161                | 488                     | 197                | 867                      | 170                | 1210                       | 0    | 1381         | 384  | 333             | 74   | 413          | 162  |
| <i>651 MHSA: Anxiety disorders per 100,000</i>                                                 | 9101            | 4450               | 9101                    | 4486               | 8780                     | 3877               | 8065                       | 2957 | 8212         | 3454 | 9222            | 4630 | 9210         | 5018 |
| <i>652 MHSA: Attention-deficit, conduct, and disruptive behavior disorders per 100,000</i>     | 667             | 299                | 667                     | 260                | 547                      | 247                | 672                        | 0    | 384          | 384  | 481             | 222  | 731          | 389  |
| <i>653 MHSA: Delirium, dementia, and amnesic and other cognitive disorders per 100,000</i>     | 604             | 2914               | 604                     | 2905               | 677                      | 2837               | 1075                       | 5108 | 460          | 1305 | 370             | 1667 | 659          | 3766 |
| <i>654 MHSA: Developmental disorders per 100,000</i>                                           | 349             | 394                | 349                     | 345                | 417                      | 387                | 538                        | 403  | 384          | 384  | 259             | 370  | 353          | 455  |
| <i>655 MHSA: Disorders usually diagnosed in infancy, childhood, or adolescence per 100,000</i> | 49              | 92                 | 49                      | 103                | 87                       | 73                 | 269                        | 269  | 0            | 153  | 37              | 111  | 48           | 96   |
| <i>656 MHSA: Impulse control disorders, NEC per 100,000</i>                                    | 31              | 17                 | 31                      | 27                 | 47                       | 10                 | 134                        | 0    | 0            | 77   | 111             | 0    | 18           | 18   |
| <i>657 MHSA: Mood disorders per 100,000</i>                                                    | 20459           | 6050               | 20459                   | 6039               | 20257                    | 5053               | 22446                      | 3360 | 20568        | 5219 | 16704           | 3926 | 21024        | 7653 |
| <i>658 MHSA: Personality disorders per 100,000</i>                                             | 1079            | 117                | 1079                    | 112                | 1437                     | 80                 | 403                        | 0    | 3761         | 77   | 593             | 74   | 1000         | 156  |
| <i>659 MHSA: Schizophrenia and other psychotic disorders per 100,000</i>                       | 5489            | 1705               | 5489                    | 1589               | 7297                     | 1757               | 7796                       | 1344 | 10821        | 2609 | 5370            | 1370 | 4946         | 1683 |

|                                                                                                |       |       |       |       |       |       |       |      |       |       |       |      |       |       |
|------------------------------------------------------------------------------------------------|-------|-------|-------|-------|-------|-------|-------|------|-------|-------|-------|------|-------|-------|
| <i>660 MHSAs: Alcohol-related disorders per 100,000</i>                                        | 13166 | 3562  | 13166 | 3599  | 9743  | 3027  | 6048  | 672  | 9670  | 3607  | 9222  | 3815 | 14485 | 4210  |
| <i>661 MHSAs: Substance-related disorders per 100,000</i>                                      | 9607  | 2981  | 9607  | 2771  | 9597  | 2603  | 4973  | 1075 | 14121 | 4068  | 9630  | 2407 | 9425  | 3437  |
| <i>662 MHSAs: Suicide and intentional self-inflicted injury per 100,000</i>                    | 4866  | 647   | 4866  | 591   | 5117  | 560   | 4167  | 269  | 7675  | 691   | 4407  | 556  | 4814  | 772   |
| <i>663 MHSAs: Screening and history of mental health and substance abuse codes per 100,000</i> | 19698 | 12274 | 19698 | 11994 | 15433 | 10963 | 11425 | 9140 | 15272 | 15196 | 12778 | 8074 | 21766 | 15623 |
| <i>670 MHSAs: Miscellaneous mental health disorders per 100,000</i>                            | 792   | 395   | 792   | 381   | 730   | 410   | 1478  | 403  | 153   | 537   | 667   | 519  | 856   | 371   |

## Model Descriptions

Logistic regression assumes a linear relationship between features and the log odds of suicide death. This method has no hyperparameters; training via maximum likelihood estimation is fast. However, the linear relationship may not be true, leading to less accurate predictions. Because it is widely used, we include logistic regression as a baseline. Naive Bayes is a probabilistic classifier that assumes conditional independence of the features given the class. We include it because it is scalable to large data sets, can handle particular types of dependencies between features, and has proven useful for real-world problems including suicide prediction[2,3]. The remaining two methods we employ, random forests and gradient boosted trees, build nonlinear models using ensembles of decision trees[4,5]. To train gradient boosted trees and random forests, we use XGBoost[6]; all other models are trained using scikit-learn[7].

When modeling with random forests we use 100 trees; we find that the optimal tree depth depends on the resampling method chosen. Increasing depth increases specificity at the expense of sensitivity; essentially, deeper trees overfit the negative class. For gradient boosted trees, we achieve the best results with trees of depth at most 2, but generally a depth of 1 was preferable. For choosing the depth parameter for random forests and gradient boosted trees we chose one depth and used that parameter for each of the 10 runs, we did not select a new depth parameter for each of the reshuffled data sets.

For each of the 10 runs for each model type we shuffle the data with a new random seed by patient RLN and split the data into training/validation/test sets by RLN. This ensures the patient groups are disjoint across the training, validation, and test sets. We then run each model with parameters chosen from a single run.

For all models, we adjust the threshold  $\tau$  so that training specificity equals 0.76. This approximately equalizes test set specificities, enabling comparison of models based on test set sensitivity. Like the depth parameter, we selected a  $\tau$  parameter based on one run of the model and applied this value for each of the 10 runs.

To calculate average model range, we calculated the range for each run of the model and then report the average and the standard deviation. We do not report the range of the averaged values by race.

We also present the quantile-quantile plot of the results of 100 logistic regression models for sensitivity Figure S1, specificity Figure S2, and AUC Figure S3. This shows that the results from the models with different random seeds are normally distributed and that the standard deviation metric is informative.

Due to the size of the predictor space and the model, printing the complete model is not feasible nor do we find that it would be very informative. However, upon request, we are happy to share the trained models as saved Python objects, together with instructions on how to apply these trained models, e.g., with synthetic data, to generate predictions.

## Results

### Fairness Metrics

We begin with the following premise: we seek models for which *the opportunity to receive treatment is independent of racial/ethnic group identity, conditional on the true outcome*. In this regime, all racial/ethnic groups would have equal opportunities to receive outreach services and interventions to prevent suicide death.

We formalize this in the language of probability by defining three random variables:  $A$ ,  $\hat{Y}$ , and  $Y$ . Here  $A$  denotes racial/ethnic identity (or, more generally, any protected attribute),  $\hat{Y}$  denotes our model's prediction, and  $Y$  denotes the true label[8]. Then, we can express our goal (the italicized clause above) as follows:

$$\Pr\{\hat{Y} = 1 | A = \text{race}, Y = y\} = \Pr\{\hat{Y} = 1 | Y = y\} \quad y \in \{0,1\}$$

In words, this equation states that regardless of racial/ethnic group identity, each patient will have the same probability of receiving treatment.

Following the laws of probability, the above equation implies the *equal odds*[8] criterion

$$\Pr\{\hat{Y} = 1 | A = \text{race1}, Y = y\} = \Pr\{\hat{Y} = 1 | A = \text{race2}, Y = y\} \quad y \in \{0,1\}$$

If we only enforce this criterion on records that correspond to patients who have died by suicide, we obtain the *equal opportunity*[8] criterion

$$\Pr\{\hat{Y} = 1 | A = \text{race1}, Y = 1\} = \Pr\{\hat{Y} = 1 | A = \text{race2}, Y = 1\}$$

In our context, equal opportunity is equivalent to balancing the model's sensitivity or TPR (true positive rate) across racial/ethnic groups. Equal odds is equivalent to balancing both the TPR and the FPR (false positive rate) across racial/ethnic groups. As specificity is 1-FPR, we see that equal odds is equivalent to balancing both sensitivity and specificity across racial/ethnic groups.

In Table 2 (sensitivity), a range of zero indicates that conditional on a patient's predictors, the probability of  $\hat{Y} = 1$  (suicide death) would not depend on the patient's racial/ethnic group (i.e., the equal opportunity criteria)[8]. If the same model also had zero range in Table 3 (specificity), that would indicate that conditional on a patient's predictors, the probability of either  $\hat{Y} = 1$  or  $\hat{Y} = 0$  would not depend on the patient's racial/ethnic group (i.e., the equal odds criteria)[8].

In addition to the Separate and Equity models fulfilling equal odds criteria, we also see a major flaw with the Blind method. When training with the Blind method, White patient files (a majority of the data set) are much more likely to be classified as positive for suicide death regardless of the true label (high sensitivity, low specificity). The opposite is true for all minority groups with patient files much less likely to be positive for suicide death regardless of true label (low sensitivity, high specificity). This model's overreliance on race/ethnicity features dominates whatever it learns about other features that predict suicide death.

#### Additional Results

In the main text, we report average model performance with standard deviation on data that has been shuffled, split and resampled with 10 random seeds to ensure the robustness of these methods. To show that reporting the average with standard deviation is a meaningful metric we run 100 simulations on the logistic regression model to show the sensitivity, specificity, and AUC metrics are normally distributed. This is shown in Figure S1-S3.

In this work, we only report performance on the test set. We do not report performance on developmental data (train and validation set) because (i) metrics on the training set would be slightly inflated due to the fact the model learns from the training set and (ii) the validation set results would be very similar to the test set results.

*Figure S1 Quantile-quantile plot for sensitivity of 100 runs of a logistic regression model. This shows the performance on the sensitivity metric is normally distributed over 100 runs. Figure produce by author (MR).*

*Figure S2 Quantile-quantile plot for specificity of 100 runs of a logistic regression model. This shows the performance on the specificity metric is normally distributed over 100 runs. Figure produce by author (MR).*

*Figure S3 Quantile-quantile plot for AUC of 100 runs of a logistic regression model. This shows the performance on the AUC metric is normally distributed over 100 runs. Figure produce by author (MR).*

### References

- 1 Collins GS, Reitsma JB, Altman DG, *et al.* Transparent reporting of a multivariable prediction model for individual prognosis or diagnosis (TRIPOD): The TRIPOD Statement. *European Urology* 2015;**67**. doi:10.1016/j.eururo.2014.11.025
- 2 Zhang H. The Optimality of Naive Bayes. In: Barr V, Markov Z, eds. *Proceedings of the Seventeenth International Florida Artificial Intelligence Research Society Conference, Miami Beach, Florida, USA*. AAAI Press 2004. 562–7. <http://www.aaai.org/Library/FLAIRS/2004/flairs04-097.php>
- 3 Barak-Corren Y, Castro VM, Javitt S, *et al.* Predicting suicidal behavior from longitudinal electronic health records. *American Journal of Psychiatry* 2017;**174**:154–62.
- 4 Hastie T, Tibshirani R, Friedman JH. *The Elements of Statistical Learning*. Second. New York, NY, USA: : Springer 2009.
- 5 Breiman L, Friedman JH, Olshen RA, Stone CJ. *Classification and Regression Trees*. 2017. doi:10.1201/9781315139470
- 6 Chen T, Guestrin C. Xgboost: A scalable tree boosting system. In: *Proceedings of the 22nd ACM SIGKDD International Conference on Knowledge Discovery and Data Mining*. 2016. 785–94.
- 7 Pedregosa F, Varoquaux G, Gramfort A, *et al.* Scikit-learn: Machine Learning in Python. *Journal of Machine Learning Research* 2011;**12**:2825–30.
- 8 Hardt M, Price E, Srebro N. Equality of opportunity in supervised learning. In: *Advances in Neural Information Processing Systems*. 2016. 3315–23.
